# Supplementary material for: Doxorubicin induces an extensive transcriptional and metabolic rewiring in yeast cells
Source: PubMed Central journal article supplement (PMC6135803; doi:10.1038/s41598-018-31939-9), 2018-09-12
Supplement: 41598_2018_31939_MOESM1_ESM.pdf [file 41598_2018_31939_MOESM1_ESM.pdf]

## Supplementary Information for

### Doxorubicin induces an extensive transcriptional and metabolic rewiring in yeast cells

Hilal Taymaz-Nikerel, Muhammed Erkan Karabekmez, Serpil Eraslan, Betül Kirdar

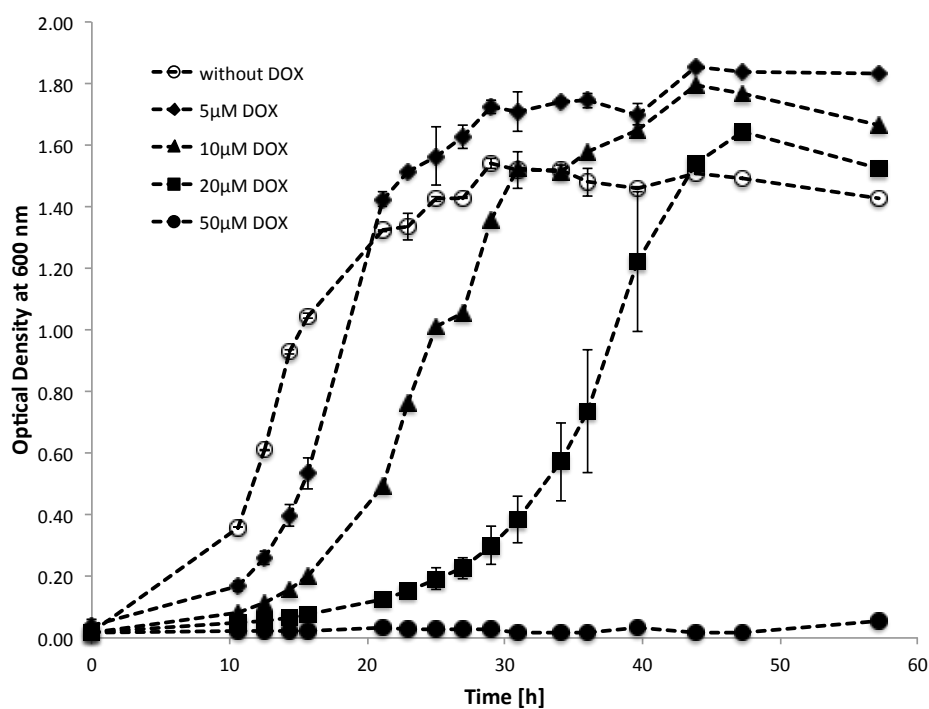

**Figure S1:** Growth curves with different concentrations of doxorubicin (DOX) in shake-flasks

**Table S1:** Uptake/secretion rates during mid-exponential phase in aerobic batch cultures of *S. cerevisiae*

|                  | $q_x$<br>[h <sup>-1</sup> ] | $-q_{\text{glucose}}$<br>[mmol gX <sup>-1</sup> h <sup>-1</sup> ] | $q_{\text{glycerol}}$<br>[mmol gX <sup>-1</sup> h <sup>-1</sup> ] | $q_{\text{ethanol}}$<br>[mmol gX <sup>-1</sup> h <sup>-1</sup> ] |
|------------------|-----------------------------|-------------------------------------------------------------------|-------------------------------------------------------------------|------------------------------------------------------------------|
| Control          | 0.26                        | 11.7                                                              | 1.3                                                               | 18.8                                                             |
|                  | 0.25                        | 13.1                                                              | 0.7                                                               | 13.1                                                             |
|                  | 0.28                        | 14.4                                                              | 1.3                                                               | 24.6                                                             |
| with doxorubicin | 0.11                        | 5.1                                                               | 0.7                                                               | -                                                                |
|                  | 0.09                        | 6.8                                                               | 0.7                                                               | 6.8                                                              |
|                  | 0.11                        | 7.5                                                               | 0.5                                                               | 6.2                                                              |
