# Supplementary material for: Doxorubicin induces an extensive transcriptional and metabolic rewiring in yeast cells
Source: PubMed Central journal article supplement (PMC6135803; doi:10.1038/s41598-018-31939-9), 2018-09-12
Supplement: 41598_2018_31939_MOESM2_ESM.pdf [file 41598_2018_31939_MOESM2_ESM.pdf]

## Supplementary Information for

### Doxorubicin induces an extensive transcriptional and metabolic rewiring in yeast cells

Hilal Taymaz-Nikerel, Muhammed Erkan Karabekmez, Serpil Eraslan, Betul Kirdar

**Table S7:** Primer sequences of the genes analyzed in RT-qPCR

| Gene          | Primers                                                         | Gene         | Primers                                                     |
|---------------|-----------------------------------------------------------------|--------------|-------------------------------------------------------------|
| RFX1          | Left GGCTCCCATAAACCATCTCC<br>Right AGGTTGCCGTTGTGTTGC           | <i>HUG1</i>  | Left GTCAAGACCGGCTACTTATTCC<br>Right ACGTTCGACGGCAATGAT     |
| CUP2          | Left GAAATTAAGGCCGACAGCAT<br>Right CTTTGCTCAAGCGGATCG           | <i>NHP6A</i> | Left GGACAAGTCGGCAAGAAGTT<br>Right TCGTAAGGCTGCTTTTCCTC     |
| <i>PDR8</i>   | Left TAGAGATAACCACGGACAAGAACC<br>Right TCTTTTGCATTACCTTGCAAATC  | <i>HTB2</i>  | Left CCAAAGCTCCAGCTGAAAAG<br>Right TACCATCGACGGAGGTTGA      |
| <i>SRX1</i>   | Left TCAAGGGACAGACGCTATATTATG<br>Right GGCGGTTCGTATGCCTGTA      | <i>BNA4</i>  | Left GGAAAGGCCATCCTACTCG<br>Right TACCTTGGCCGTAAAATGGA      |
| <i>FRE7</i>   | Left CCATTCTACAGACCTTGTGCAG<br>Right ATTATGCCTGCACGAACAGA       | <i>ADH5</i>  | Left TGGTACTTTTCAAGAATACGCAAC<br>Right CAAGATTGACGTTTGGTGGA |
| <i>SGS1</i>   | Left AGGGGGTGGTAAATCTCTTTG<br>Right TGTGTTTTACCCGATTCACC        | <i>ENO1</i>  | Left TGTCCCATCTGGTGCTTCTA<br>Right TCCACTTGGATTTGTCACCA     |
| <i>REC104</i> | Left AGTGACACATTATATGACGATCCTTT<br>Right CCTCTATTCATCTCCTGCTTGA | <i>SHM2</i>  | Left CTTTGGTTCAGGTGGTGTC<br>Right TCACCCATTCTCTAGTGGTC      |
| <i>ATG39</i>  | Left TGCATGAAAGCTCCTTTGC<br>Right GTGTTTCGATAGGACATCTGCAT       | <i>ARG4</i>  | Left GCGTTGAAAGACGAGATGCT<br>Right CCAATTGCTTCAATACAGCAGA   |
| <i>YAP6</i>   | Left CTCCCATCTCGCAATACCA<br>Right GCGGTATCAGCACTGTTTTG          |              |                                                             |

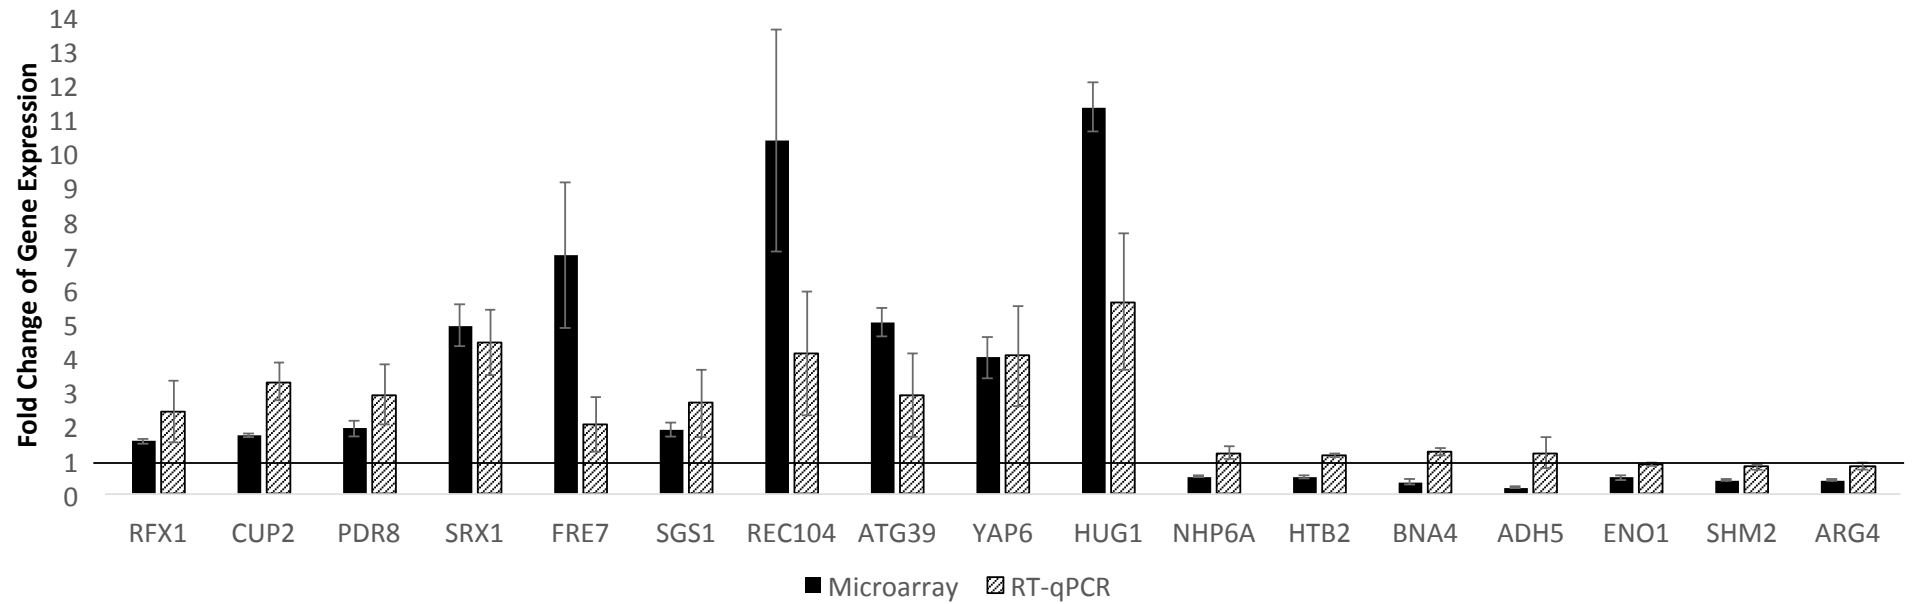

**Figure S2:** Comparison of fold change in the expression of selected differentially expressed genes in the presence of doxorubicin relative to control, obtained via microarray or RT-qPCR analysis. Error bars represent the standard errors.

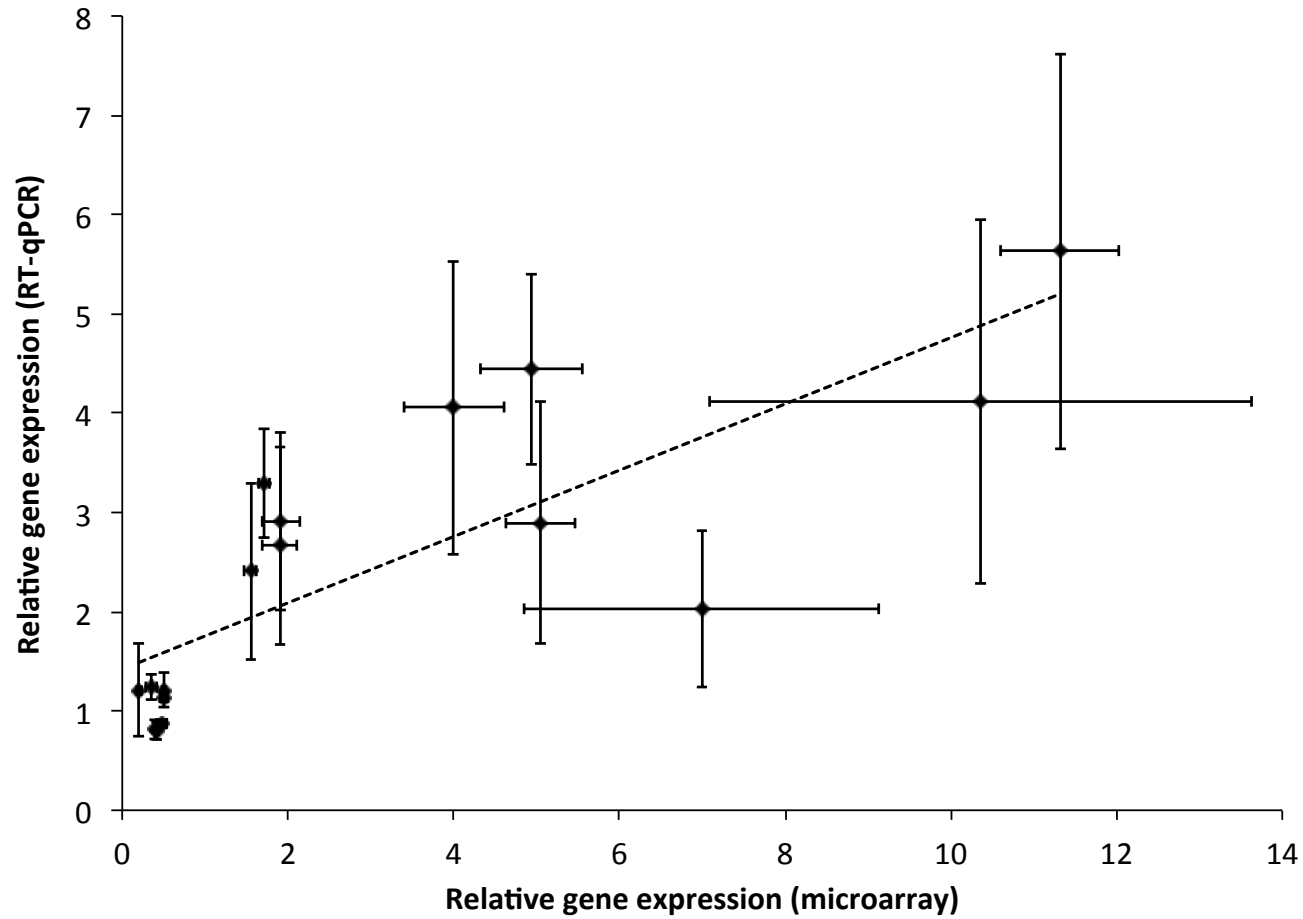

**Figure S3:** Correlation analysis of RT-qPCR and microarray data of selected differentially expressed genes. Line fit plot showed a significant correlation ( $r=0.8018$ ,  $p\text{-value}=0.00011$ ,  $n=17$ ,  $df=15$ ).
